# Supplementary material for: Nervous System Regionalization Entails Axial Allocation before Neural Differentiation
Source: PubMed Central journal article supplement (PMC6218657; doi:10.1016/j.cell.2018.09.040), 2018-11-01
Supplement: mmc3.pdf [file mmc3.pdf]

TABLE S3. WNT reporter activity and CDX2 expansion in mouse embryos cultured in control versus WNT signalling conditions, Related to Figure 5.

| <b>Stage</b> | <b>Condition</b>        | <b>WNT reporter expansion</b> | <b>CDX2 expansion</b> |
|--------------|-------------------------|-------------------------------|-----------------------|
| E7.0         | No treatment; N=4       | 0/8                           | 0/7                   |
| E7.0         | FGF treatment; N=2      | 0/3                           | 0/3                   |
| E7.0         | CHIR treatment; N=4     | 6/7                           | 7/8                   |
| E7.0         | FGF/CHIR treatment; N=3 | 4/6                           | 3/5                   |
| E7.5         | No treatment; N=1       | N/A                           | 0/1                   |
| E7.5         | FGF treatment; N=6      | 0/6                           | 0/29                  |
| E7.5         | CHIR treatment; N=1     | N/A                           | 0/1                   |
| E7.5         | FGF/CHIR treatment; N=6 | 13/16                         | 0/31                  |

Table S5. Primers used for qPCR, Related to STAR Methods.

| <b>Primer</b> | <b>Sequence</b>           |
|---------------|---------------------------|
| Actin_F       | TGGCTCCTAGCACCATGA        |
| Actin_R       | CCACCGATCCACACAGAG        |
| Cdx2_F        | TAGTCGATACATCACCATCAGG    |
| Cdx2_R        | TGATTTTCCTCTCCTTGGCTCT    |
| Dbx1_F        | CTATTTCCAGCTTCCTCCA       |
| Dbx1_R        | GCTTCTGGAACGTCTTCTCC      |
| Hoxb4_F       | AGCACGGTAAACCCCAATTACG    |
| Hoxb4_R       | CGCGTCAGGTAGCGATTGTAG     |
| Hoxb8_F       | CAGCTCTTTCCCTGGATG        |
| Hoxb8_R       | CACTTCATTCTCCGATTCTG      |
| Hoxb9_F       | TAATCAAAGAGCTGGCTACG      |
| Hoxb9_R       | CCCTGGTGAGGTACATATTG      |
| Hoxc4_F       | AAGCAACCCATAGTCTACCCTTG   |
| Hoxc4_R       | CTCCGTTATAATTGGGGTTCACCGT |
| Hoxc6_F       | CAGGTAAAGGCAAAGGGATG      |
| Hoxc6_R       | ATAGGCGGTGGAATTGAGG       |
| Hoxc8_F       | GAAGGACAAGGCCACTTAAAT     |
| Hoxc8_R       | AGGTCTGATACCGGCTGTAAGTTT  |
| Notum_F       | GCCAGTTCAAGGAAGGAGAG      |
| Notum_R       | AAGCCACTGTACCACGAACA      |
| Olig2_F       | AGACCGAGCCAACACCAG        |
| Olig2_R       | AAGCTCTCGAATGATCCTTCTTT   |
| Pax7_F        | CAGCCAGCAAGACATTCC        |
| Pax7_R        | ACCACAGATACAAGCCATTC      |
| Phox2b_F      | GATAAGGACCACTTTTGGGGC     |
| Phox2b_R      | GTTTGTATGGAAGTGCAGCG      |
| T/Bra_F       | ACACACGGCTGTGAGAGGTA      |
| T/Bra_R       | TTATCATGGGACTGCAGCAT      |

Table S6. Primer sequences used for barcoding ATAC-seq libraries, Related to STAR Methods.

| Nextera index   | Primer Sequence                                       |
|-----------------|-------------------------------------------------------|
| Ad1_noMX:       | AATGATACGGCGACCACCGAGATCTACACTCGTCGGCAGCGTCAGATGTG    |
| Ad2.1_TAAGGCGA  | CAAGCAGAAGACGGCATACGAGATTCGCCTTAGTCTCGTGGGCTCGGAGATGT |
| Ad2.2_CGTACTAG  | CAAGCAGAAGACGGCATACGAGATCTAGTACGGTCTCGTGGGCTCGGAGATGT |
| Ad2.3_AGGCAGAA  | CAAGCAGAAGACGGCATACGAGATTTCTGCCTGTCTCGTGGGCTCGGAGATGT |
| Ad2.4_TCCTGAGC  | CAAGCAGAAGACGGCATACGAGATGCTCAGGAGTCTCGTGGGCTCGGAGATGT |
| Ad2.5_GGACTCCT  | CAAGCAGAAGACGGCATACGAGATAGGAGTCCGTCTCGTGGGCTCGGAGATGT |
| Ad2.6_TAGGCATG  | CAAGCAGAAGACGGCATACGAGATCATGCCTAGTCTCGTGGGCTCGGAGATGT |
| Ad2.7_CTCTCTAC  | CAAGCAGAAGACGGCATACGAGATGTAGAGAGGTCTCGTGGGCTCGGAGATGT |
| Ad2.8_CAGAGAGG  | CAAGCAGAAGACGGCATACGAGATCCTCTCTGGTCTCGTGGGCTCGGAGATGT |
| Ad2.9_GCTACGCT  | CAAGCAGAAGACGGCATACGAGATAGCGTAGCGTCTCGTGGGCTCGGAGATGT |
| Ad2.10_CGAGGCTG | CAAGCAGAAGACGGCATACGAGATCAGCCTCGGTCTCGTGGGCTCGGAGATGT |
| Ad2.11_AAGAGGCA | CAAGCAGAAGACGGCATACGAGATTGCCTCTTGTCTCGTGGGCTCGGAGATGT |
| Ad2.12_GTAGAGGA | CAAGCAGAAGACGGCATACGAGATTCCTCTACGTCTCGTGGGCTCGGAGATGT |
